# Supplementary material for: Enhanced proton conductivity of multiblock poly(phenylene ether ketone)s via pendant sulfoalkoxyl side chains with excellent H2/air fuel cell performance
Source: Royal Society of Chemistry journal article supplement (doi:10.1039/c5ta09320a), 2016-01-01
Supplement: c5ta09320a1.pdf [file c5ta09320a1.pdf]

## Supporting Information

### Enhanced Proton Conductivity of Multiblock Poly(phenylene ether ketone)s via Pendant Sulfoalkoxyl Side Chain with Excellent H<sub>2</sub>/Air Fuel Cell Performance

Tiandu Dong <sup>a</sup>, Jiahui Hu <sup>a</sup>, Mitsuru Ueda <sup>b</sup>, Yiming Wu <sup>a</sup>, Xuan Zhang <sup>a\*</sup>,

Lianjun Wang <sup>a\*</sup>,

- a) Jiangsu Key Laboratory of Chemical Pollution Control and Resources Reuse,  
School of Environmental and Biological Engineering, Nanjing University of  
Science & Technology, 200 Xiaolingwei, Nanjing 2100094, Jiangsu Province,  
China.
- b) Department of Organic and Polymeric Materials, Tokyo Institute of Technology,  
2-12-1 O-okayama, Meguro-Ku, Tokyo 152-8552, Japan

#### Corresponding Authors:

X.Z.: E-mail: [xuanzhang@mail.njust.edu.cn](mailto:xuanzhang@mail.njust.edu.cn).

L.W.: E-mail: [wanglj@njust.edu.cn](mailto:wanglj@njust.edu.cn).

## MesoDyn simulation details

In mesoscale simulation, topology of polymer chain is defined as a Gaussian chain composed of coarse-grained beads. Each bead represents the group or cluster of molecules. Originally, the number (or length) of each bead in Gaussian chain was calculated by Equation (1):

$$N_{\text{bead}} = M_{\text{polymer}} / (M_{\text{monomer}} C_n) \quad (1)$$

Here,  $N_{\text{bead}}$  is the number of beads,  $M_{\text{polymer}}$  is the molecular weight of the polymer (an approximate value of 50,000 was used),  $M_{\text{monomer}}$  is the molecular weight of the monomer and  $C_n$  is the characteristic ratio of the polymer. The Flory-Huggins  $\chi$  parameters as interaction parameters between two beads for simulation in MesoDyn were calculated by Equation (2):

$$\chi_{AB} = V_{\text{ref}} (\delta_A - \delta_B)^2 / RT \quad (2)$$

Here,  $V_{\text{ref}}$  is a reference volume, which was the mean molar volume of two beads in this study.  $\delta$  is a solubility parameter of each bead,  $R$  is the gas constant and  $T$  is absolute temperature. We calculated  $\chi$  parameters with the solubility parameters obtained by van Krevelen prediction in Synthia module (see Table S1 and S2). Finally, the input parameter for MesoDyn module was calculated from Eqn (3):

$$v^{-1} \epsilon_{AB} = \chi_{AB} RT \quad (3)$$

Other parameters used in this simulation are the followings: the time step of 50 ns, the noise parameter of 75.002, the compressibility parameter of 10 kT, the grid spacing of 1.0 nm, the total grid size of 32 nm x 32 nm x 32 nm, temperature of 298 K, and the total number of steps of 10000.

**Gas permeability.** The experiment was carried out by the similar approach as reported elsewhere.<sup>1</sup> In brief, H<sub>2</sub> and O<sub>2</sub> permeability was measured in an in-house fuel cell station (HTS-125, Shanghai Hephass Energy Co. Ltd), equipped with a gas chromatography (Agilent 7890A GC, United States) with thermal conductivity detector. Ar and He were used as a carrier for the measurement of H<sub>2</sub> and O<sub>2</sub>, respectively. Membranes were placed in the center of the cell, and the test gas was introduced onto one side of the membrane at a flow rate of 20 mL/min. Carrier gas was introduced onto the other side of the membrane at the same flow rate and was analyzed by the GC. The same humidity conditions were applied to both test and carrier gases to ensure homogeneous wetting of the membrane samples. Each test was equilibrated over 4 h, and then 15 mL of flow gas was sampled and subjected to the GC to quantify the test gas permeated through the membrane. The measurement was repeated until stable permeation data were obtained. The gas permeability coefficient, Q (barrer = 1 × 10<sup>-10</sup> cm<sup>3</sup> (STD) cm/cm<sup>2</sup> cm mmHg), was calculated by Equ (4):

$$Q = \frac{273}{T} \times \frac{1}{A} \times B \times \frac{1}{t} \times l \times \frac{1}{76 - P_{\text{water}}}$$

(4)

where T (K) is the absolute temperature, A (cm<sup>2</sup>) is the permeation area, B (cm<sup>3</sup>) is the volume of the test gas permeated through the membrane, t (s) is the sampling time, l (cm) is the thickness of the membrane, and P<sub>water</sub> (cmHg) is the water vapor pressure.

**Table S1.** Parameters of mesoscale simulation.

| Polymer structure | Bead | Molar Volume | Solubility parameter            |  | Characteristic ratio at 298 K (Synthia) |
|-------------------|------|--------------|---------------------------------|--|-----------------------------------------|
|                   |      |              | van Krevelen at 298 K (Synthia) |  |                                         |
| DFBP              | D    | 149.78       | 21.51                           |  | 3.64                                    |
| MHQS              | MS   | 183.50       | 23.27                           |  | 3.40                                    |
| 6FBPA             | F    | 217.99       | 18.65                           |  | 3.42                                    |

**Table S2.** Calculated  $\chi$  parameters of mesoscale simulation.

| Bead Pair | $\delta_1$ | $V_1$  | $\delta_2$ | $V_2$  | $V_{\text{ref}}$ | $\chi$ parameter |
|-----------|------------|--------|------------|--------|------------------|------------------|
| D-MS      | 21.51      | 149.78 | 23.27      | 183.50 | 166.64           | 0.21             |
| D-F       | 21.51      | 149.78 | 18.65      | 217.99 | 183.89           | 0.61             |
| MS-F      | 23.27      | 183.50 | 18.65      | 217.99 | 200.74           | 1.74             |

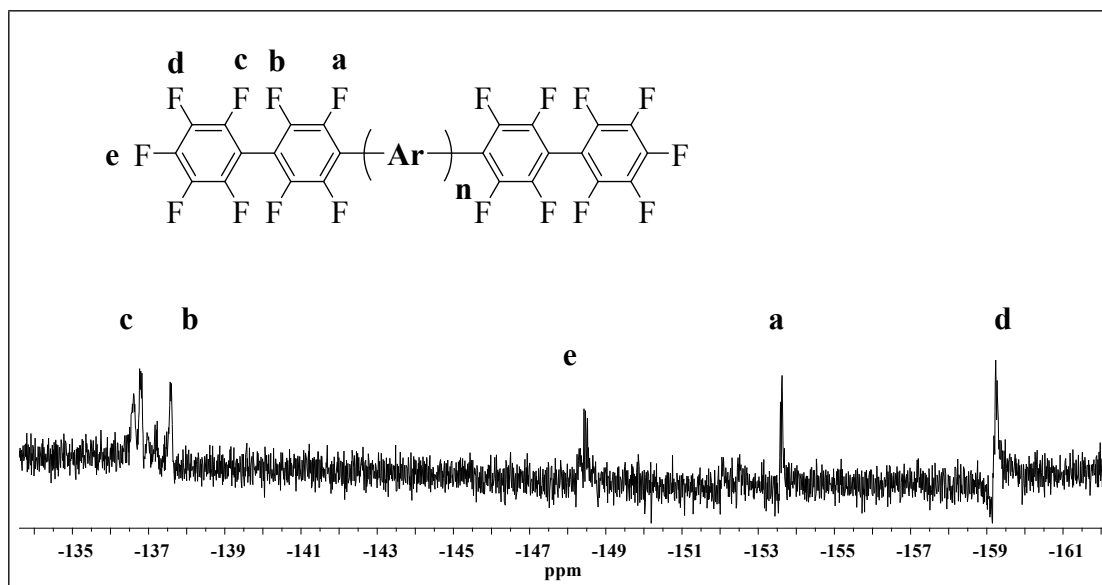

Fig. S1.  $^{19}\text{F}$  NMR of Oligomer 1.

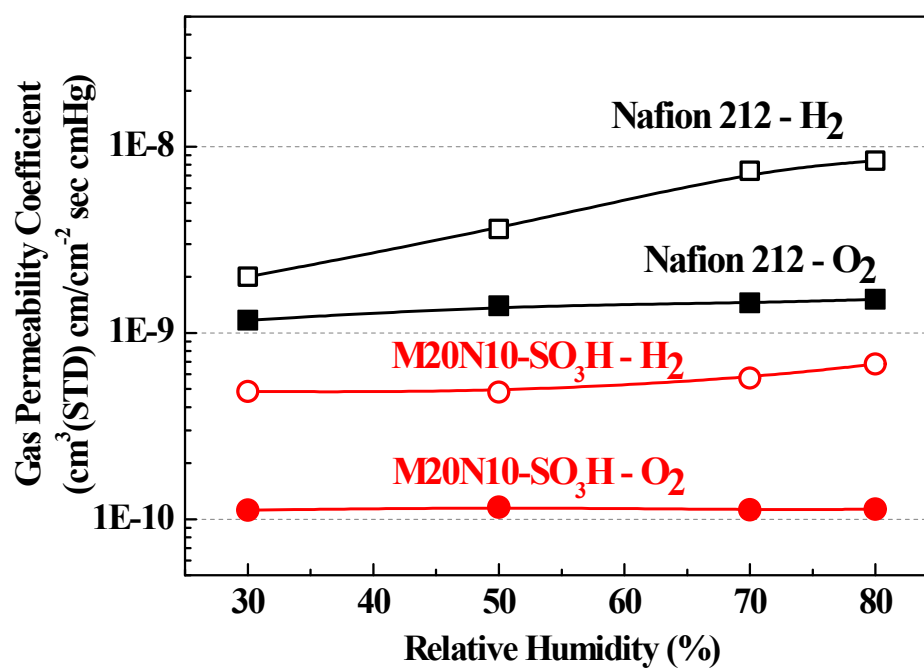

Fig. S2. Humidity dependence of  $\text{H}_2$  and  $\text{O}_2$  permeability coefficient of M20N10- $\text{SO}_3\text{H}$  and Nafion 212 membranes at  $70^\circ\text{C}$ .

**Table S3.** Oxidative stability of polymer **5**.

| Membranes                | <i>IEC/ mequiv g<sup>-1</sup></i> |              | After test           |
|--------------------------|-----------------------------------|--------------|----------------------|
|                          | <i>Cal.</i>                       | <i>Titr.</i> | RW <sup>a)</sup> / % |
| M10N5-SO <sub>3</sub> H  | 1.40                              | 1.13         | 93                   |
| M20N10-SO <sub>3</sub> H | 1.41                              | 1.41         | 95                   |
| M20N15-SO <sub>3</sub> H | 1.20                              | 1.31         | 98                   |

<sup>a</sup> Remaining weight. Measured by soaking the membrane sheets (1 cm x 4 cm) in Fenton's reagent (3% H<sub>2</sub>O<sub>2</sub> containing 2 ppm FeSO<sub>4</sub>) at 80 °C for 1 h.

## Reference

- 1 T. Miyahara, T. Hayano, S. Matsuno, M. Watanabe, K. Miyatake, *ACS Appl. Mater. Interfaces*, 2012, **4**, 2881.
